# Supplementary material for: Structure and magnetic behaviour of mono- and bimetallic chromium(iii) complexes of amine-bis(phenolate) ligands
Source: Royal Society of Chemistry journal article supplement (doi:10.1039/b910254j), 2009-10-06
Supplement: b910254j.pdf [file b910254j.pdf]

## Supplementary Information

### Structure and magnetic behavior of mono- and bimetallic chromium(III) complexes of amine-bis(phenolate) ligands†

Rebecca K. Dean,<sup>a</sup> Stephanie L. Granville,<sup>a</sup> Louise N. Dawe,<sup>b</sup> Andreas Decken,<sup>c</sup> Karen M. Hattenhauer<sup>a</sup> and Christopher M. Kozak<sup>\*a</sup>

<sup>a</sup> Department of Chemistry, Memorial University of Newfoundland, St. John's, Newfoundland, Canada A1B 3X7 Tel: +1-709-737-8082; E-mail: [ckozak@mun.ca](mailto:ckozak@mun.ca);

<sup>b</sup> C-CART X-ray Diffraction Laboratory, Department of Chemistry, Memorial University of Newfoundland, St. John's, Newfoundland, Canada

<sup>c</sup> Department of Chemistry, University of New Brunswick, Fredericton, New Brunswick, Canada E3B 5A3

E-mail: [ckozak@mun.ca](mailto:ckozak@mun.ca)

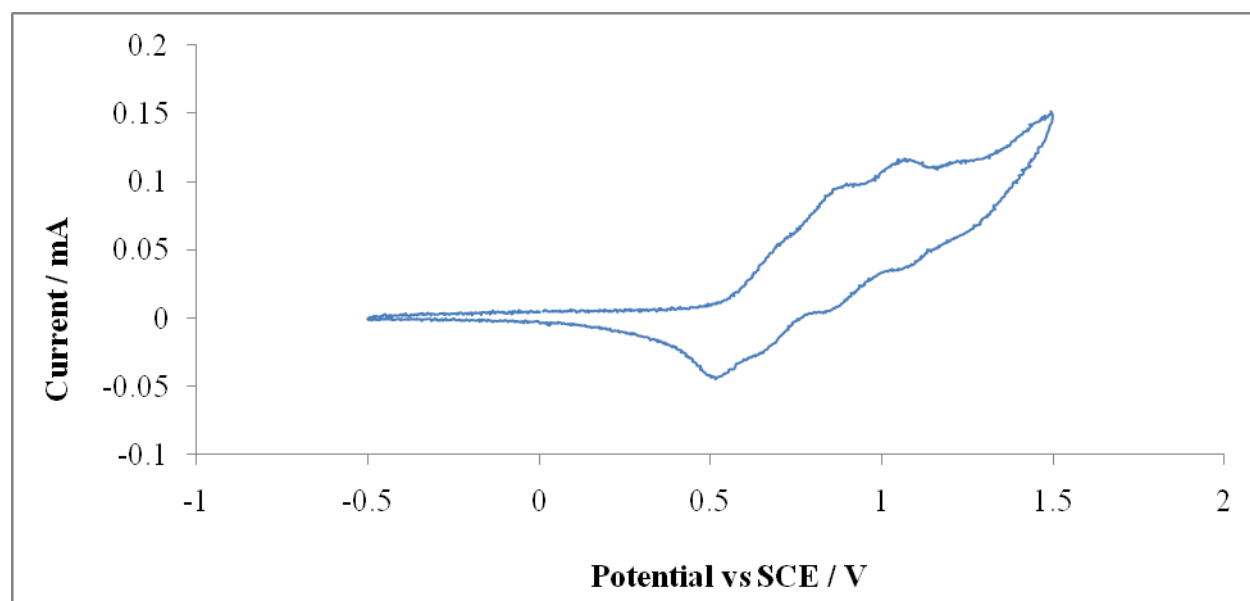

Cyclic voltammogram of **4** in CH<sub>2</sub>Cl<sub>2</sub> (0.1 M [TBA]PF<sub>6</sub>) at 20 °C and a scan rate of 200 mV s<sup>-1</sup>.

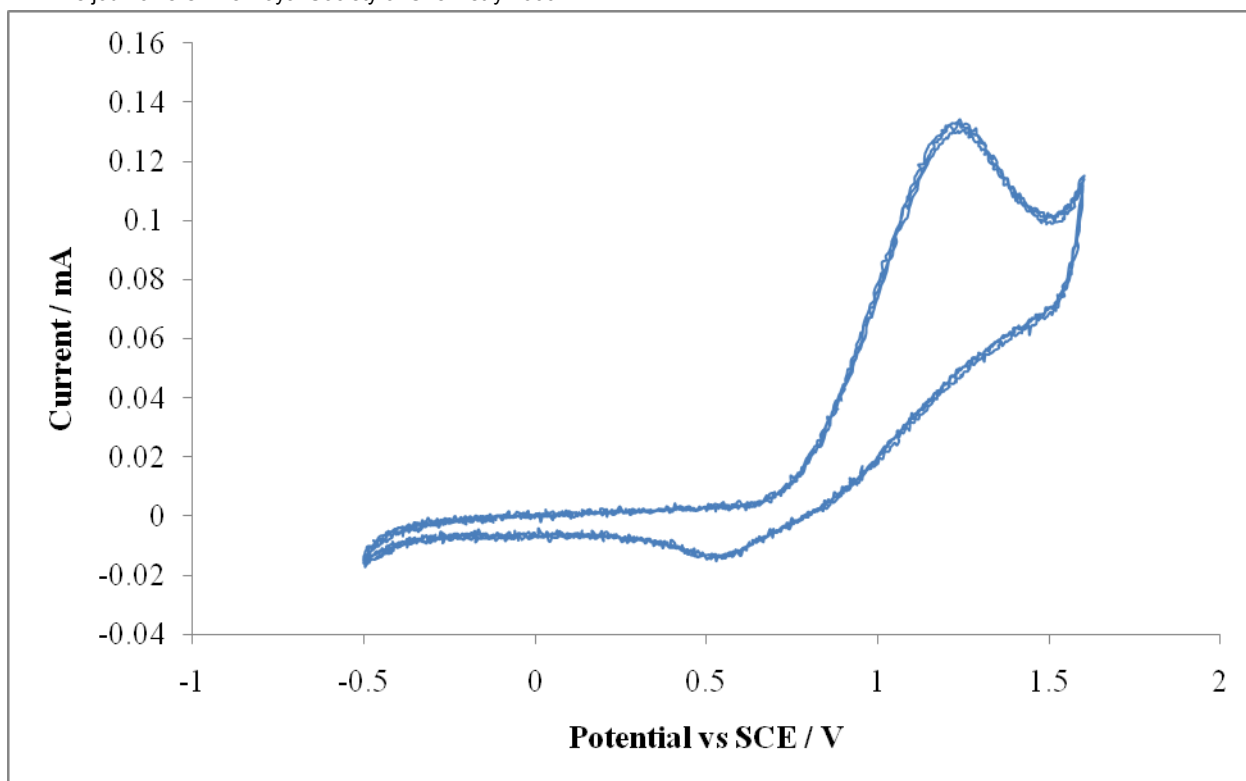

Cyclic voltammogram of  $\text{H}_2[\text{O}_2\text{NO}]^{\text{BuBu}}$  in  $\text{CH}_2\text{Cl}_2$  (0.1 M [TBA]PF<sub>6</sub>) at 20 °C and a scan rate of 200  $\text{mV s}^{-1}$ .
